# Supplementary material for: A molecularly engineered near-infrared-light-emitting electrochemical cell (NIR-LEC)
Source: Royal Society of Chemistry journal article supplement (doi:10.1039/c9nj05512f), 2019-12-23
Supplement: c9nj05512f1.pdf [file c9nj05512f1.pdf]

## Supplementary Information

Babak Nemati Bideh,<sup>a</sup> Hashem Shahroosvand<sup>a\*</sup>

Group for Molecular Engineering of Advanced Functional Materials (GMA), Chemistry Department, University of Zanjan, Zanjan, 45371-38791, Iran, Iran.

### S1.

**Materials and Methods.** All reactants and solvents were purchased from commercial sources and used as received. RuCl<sub>3</sub>·xH<sub>2</sub>O and 4,4'-dimethyl-2,2'-bipyridine was purchased from Sigma-Aldrich, 2,2'-bipyridine, 1, 10-phenanthroline, 3-carboxaldehyde pyridine, 4-methoxyaniline, ammonium acetate, glacial acetic acid and ethylene glycol from Merck. <sup>1</sup>H and <sup>13</sup>C NMR spectra were recorded using a Bruker 250 MHz spectrometer. CHN analyses were recorded with a ElementarVario analyzer. Cyclic voltammogram of complexes (2×10<sup>-3</sup>M, acetonitril as solvent) were carried out under a N<sub>2</sub> atmosphere by using SAMA500 potentiostat electrochemical analyzer with three electrode cell, Pt disk, Pt wire and Ag/AgCl as the working electrode, counter electrode and reference electrode, respectively. 0.10 M tetrabutylammonium perchlorate (TBAP) was used as supporting electrolyte and the following relation were used: formal potential E<sup>o'</sup> = (E<sub>pa</sub> + E<sub>pc</sub>)/2 where E<sub>pa</sub> and E<sub>pc</sub> are anodic and cathodic peak potentials, respectively. The HOMO/LUMO energy levels were calculated using CV data by following equation: E<sub>HOMO</sub> = -(E<sub>ox</sub>(vs. Fc/Fc<sup>+</sup>) + 4.8 eV) (E<sub>ox</sub> and E<sub>red</sub> are oxidation and reduction potentials. The reduction potential of ferrocene was found to be 0.43 V, E<sub>LUMO</sub> = E<sub>HOMO</sub> + E<sub>o-o</sub> eV, E<sub>o-o</sub> was calculated from the intersection of absorption and emission spectra in acetonitril solution. E<sub>gap</sub> = -E<sub>HOMO</sub> - E<sub>LUMO</sub> [1]. UV-visible spectra and photoluminescent (PL) spectra were recorded on an Ultrospec3100 pro spectrophotometer and a Varian-Cary Eclipse fluorospectrophotometer, respectively.

The PLQY (PL quantum yields) were calculated against [Ru(bpy)<sub>3</sub>]<sup>2+</sup> in degassed acetonitrile solution at 298 K as a standard (Φ<sub>std</sub> = 0.095 [2]) using the following equation:

$$\Phi_{unk} = \Phi_{std} \cdot \left( \frac{I_{unk}/A_{unk}}{A_{std}/I_{std}} \right) \cdot \left( \frac{\eta_{unk}}{\eta_{std}} \right)^2$$

In this equation, Φ<sub>unk</sub> is phosphorescence quantum yields of complexes, I<sub>unk</sub> and I<sub>std</sub> are the integrated areas of the corrected PL spectra and standard, respectively, A<sub>unk</sub> and A<sub>std</sub> are the absorbances of the ruthenium complexes and the standard at the excitation wavelength (λ<sub>exc</sub> = 460 nm), and η<sub>unk</sub> and η<sub>std</sub> are the indexes of refraction of the respective solvents (taken to be equal to

1 the neat solvents in both cases). Thin films of cationic ruthenium complexes for study of solid  
2 emission were obtained by drop cast from a spectrophotometric grade acetonitrile solution on a glass  
3 support with a thickness of about 90 nm. After evaporation of the solvent in air, the films were dried  
4 overnight under vacuum at room temperature.

5

6 **Device fabrication and measurement** : Indium tin oxide (ITO) coated glass with a sheet resistance  
7 of 20  $\Omega$ /square was used as anode. After being sufficiently cleaned by soaking in ultrasonicated  
8 isopropanol, acetone and deionized water, it was dried in the oven at 110°C for 1.5h. The devices were  
9 prepared by spin-coating a thin layer of each complex (Bn1, Bn2, Bn3) on top of an ITO glass substrate  
10 from a 7% (w/v) acetonitrile solution at RT. All solution and film preparation were performed under  
11 ambient conditions. The thicknesses of the films were ~ 85 nm, measured with profilometry. After  
12 spincoating, the thin films were annealed at 90 °C in inert atmosphere for 14h. A Ga: In (75.5:24.5 wt  
13 %, mp 15.7 °C) eutectic as cathode (ca. 3.5 mm diameter) was printed on the top of the active layer at  
14 room temperature by using a special syringe (glass syringe with needle diameter about 1.5 mm) [7]  
15 and then connected via a thin copper wire inserted into the Ga:In contact. Finally it was sealed with  
16 epoxy cement. All EL measurement were carried out in air atmosphere. The current density,  
17 luminescence versus the voltage and emission characteristics of LEC devices were measured using an  
18 AvaSpec-125 spectrophotometer, a SAMA500 electroanalyzer system and a Photo Research PR-650  
19 spectroradiometer.

20 **S2.**

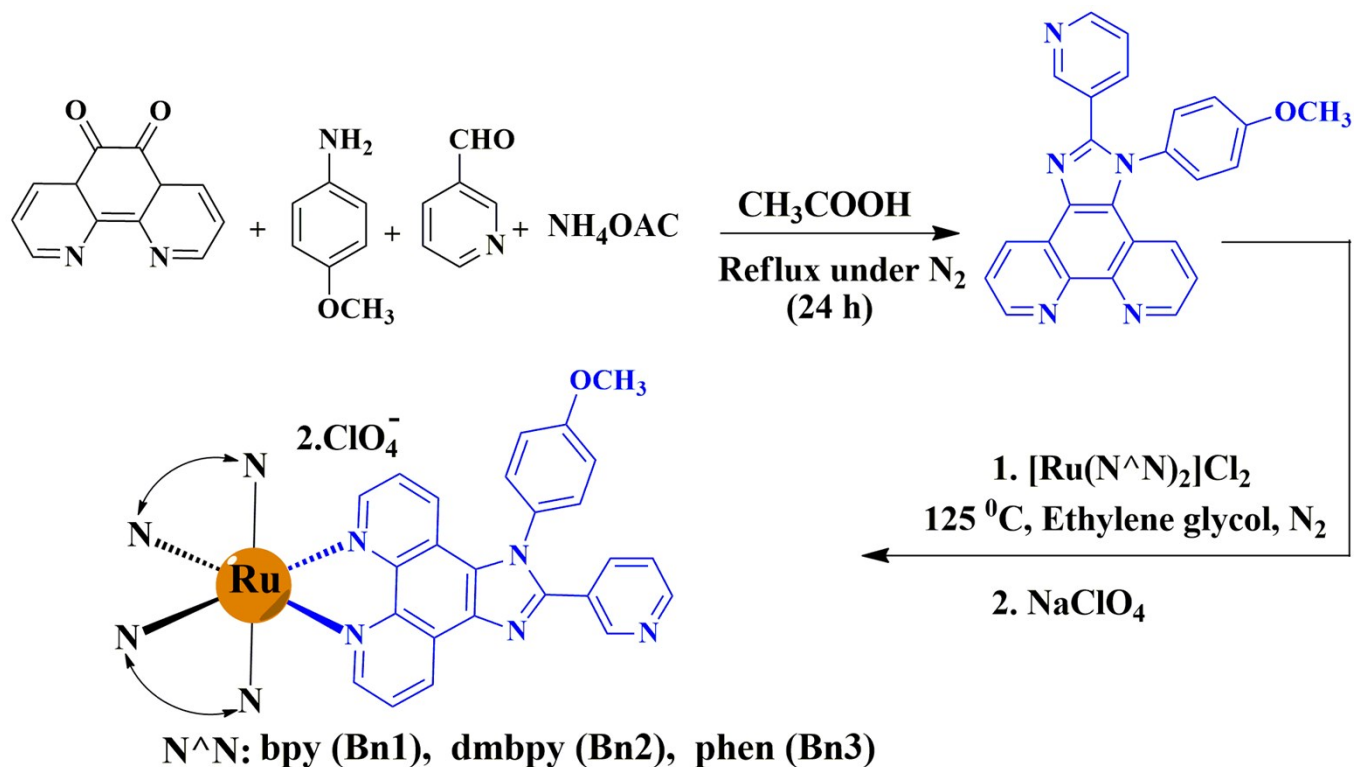

**Figure S1.** Synthesis of phenanthroimidazole ligand based (mpip) and their ruthenium(II) complexes

**Synthesis and characterization:** The precursor compounds of ruthenium complexes with formula of  $\text{cis-}[\text{Ru}(\text{N}^{\wedge}\text{N})_2\text{Cl}_2] \cdot 2\text{H}_2\text{O}$  ( $\text{N}^{\wedge}\text{N}$ : bpy, dmbpy, phen) and 1,10-phenanthroline-5,6-dione were synthesized according to reference methods [3-6].

**1-(4-methoxyphenyl)-2-(pyridin-3-yl)-1H-imidazo[4,5-f][1,10]phenanthroline (mpip).** The ligand was prepared by refluxing phendione (0.212 g, 1.0 mmol), 3-pyridine carboxaldehyde (0.11 g, 1 mmol), 4-methoxyaniline (0.13 g, 1 mmol), and ammonium acetate (770 mg, 10 mmol, excess) in glacial acetic acid (7 mL) for 24 h under a nitrogen atmosphere. The solution was cooled to room temperature, then added 25 mL deionized water and neutralized with a 25% aqueous ammonia solution and extracted with 40 mL of chloroform. After removed the solvent, the residue was washed with cool ethanol /acetone (1:3). The solid was dissolved in a minimum of  $\text{CHCl}_3$  and then added 10 fold acetone. The solution kept in refrigerator at  $-5\text{ }^\circ\text{C}$  for a 12h and then the precipitate was isolated and dried to give the product as a grey solid. Yield: 41%. mp.  $281\text{ }^\circ\text{C}$ , Anal. calcd. For  $\text{C}_{25}\text{H}_{17}\text{N}_5\text{O}$  (%): C, 74.433; H, 4.255; N, 17.367. Found (%): C, 74.429; H, 4.251; N, 17.369.  $^1\text{H-NMR}$  (250 MHz,  $\text{CDCl}_3$ ): 9.16 (d, 1H), 9.07(m, 2H), 8.78 (s, 1H), 8.56 (d, 1H), 7.96 (d, 1H), 7.74 (m, 1H), 7.51-7.41(m, 3H), 7.32-7.25 (m, 2H), 7.12 (d, 2H), 3.94 (s, 3H, methoxy).  $^{13}\text{C-NMR}$  (62 MHz,  $\text{D}_6\text{-DMSO}$ ): 160.92, 149.88, 149.63,

1 149.13, 148.16, 146.4, 136.38, 130.39, 129.62, 128.04, 126.34, 123.57, 123.19, 122.22, 119.75, 115.84, 55.68  
2 (carbon of methoxy group).

3

4 **General procedure for synthesis of [Ru(N<sup>^</sup>N)<sub>2</sub>(mpip)](ClO<sub>4</sub>)<sub>2</sub>:** A mixture of cis-  
5 [Ru(N<sup>^</sup>N)<sub>2</sub>Cl<sub>2</sub>].2H<sub>2</sub>O (0.1 mmol) and mpip (0.1 mmol) was degassed by N<sub>2</sub> and heated under N<sub>2</sub> at 126  
6 °C in ethylene glycol (5 ml) for 16.0 h. After this time, the dark purple solution was cooled to room  
7 temperature, precipitated by dropwise addition to an saturated NaClO<sub>4</sub> solution and allowed to  
8 rapidly stir for 10 min. The orange precipitate was collected and several time washed with deionized  
9 water to remove trace of salts. The product was purified by column chromatography on alumina with  
10 acetonitril-toluene (3/1, v/v) as an eluent. Then, the solvent was removed under reduced pressure and  
11 red solid were obtained.

12

13 **[Ru(bpy)<sub>2</sub>(mpip)](ClO<sub>4</sub>)<sub>2</sub> (Bn1).** Yield: 74% (73 mg). Anal. calcd. For C<sub>45</sub>H<sub>33</sub>Cl<sub>2</sub>N<sub>9</sub>O<sub>9</sub>Ru(%): C, 53.216;  
14 H, 3.275; N, 12.414 Found (%): C, 53.212; H, 3.279; N, 12.411. <sup>1</sup>HNMR (250 MHz, D<sub>6</sub>-DMSO): 9.19 (d, 1H),  
15 8.83 (m, 5H), 8.60 (d, 1H), 8.30-8.09 (m, 5H), 8.02-7.96 (m, 3H), 7.82 (t, 2H), 7.74-7.63(m, 3H), 7.65  
16 (m, 5H), 7.47 (m, 1H), 7.35 (t, 2H), 7.23 (t, 2H), 3.87 (s, 3H, methoxy). <sup>13</sup>CNMR (62 MHz, CDCl<sub>3</sub>): 161.14,  
17 157.00, 152.04, 150.82, 149.86, 146.04, 145.82, 138.45, 138.36, 137.06, 136.55, 131.01, 130.39, 128.82, 128.70,  
18 128.22, 127.43, 126.37, 125.97, 125.92, 124.90, 121.95, 116.31, 56.14 (carbon of methoxy group of mpip).

19 **[Ru(dmbpy)<sub>2</sub>(mpip)](ClO<sub>4</sub>)<sub>2</sub> (Bn2).** Yield: 67% (69 mg). Anal. calcd. For C<sub>49</sub>H<sub>41</sub>Cl<sub>2</sub>N<sub>9</sub>O<sub>9</sub>Ru (%): C,  
20 54.916; H, 3.86 N, 11.767 Found (%): C, 54.911; H, 3.864 N, 11.762. <sup>1</sup>HNMR (250 MHz, D<sub>6</sub>-DMSO): ): 9.15  
21 (d, 1H), 8.77 (d, 1H), 8.68 (m, 4H), 8.58 (d, 1H), 8.14 (d, 1H), 7.97 (m, 3H), 7.75-7.63 (m, 5H), 7.58-7.39  
22 (m, 6H), 7.26-7.18 (m, 4H), 3.87 (s, 3H, methoxy), 2.45 (s, 12H, overlap with DMSO peak). <sup>13</sup>CNMR (62  
23 MHz, D<sub>6</sub>-DMSO): ): 161.18, 156.59, 151.97, 150.92, 150.40, 150.15, 150.06, 149.83, 146.25, 146.02, 137.05,  
24 136.52, 130.41, 129.71, 129.00, 128.85, 128.68, 128.22, 127.32, 126.24, 125.99, 125.83, 125.46, 123.99, 122.87,  
25 116.29, 56.13 (carbon of methoxy group of mpip), 21.10 (carbon of methyl group of dmbpy).

26 **[Ru(phen)<sub>2</sub>(mpip)](ClO<sub>4</sub>)<sub>2</sub> (Bn3).** Yield: 63% (68 mg). Anal. calcd. For C<sub>49</sub>H<sub>33</sub>Cl<sub>2</sub>N<sub>9</sub>O<sub>9</sub>Ru (%): C,  
27 55.322; H, 3.13; N, 11.857 Found (%): C, 55.328; H, 3.19; N, 11.852. <sup>1</sup>HNMR (250 MHz, D<sub>6</sub>-DMSO): ): 9.17  
28 (d, 1H), 8.75 (m, 4H), 8.62 (d, 1H), 8.35 (m, 4H), 8.09-7.98 (m, 8H), 7.75 (m, 8H), 7.54-7.41 (m, 3H),  
29 7.2 (m, 2H), 3.85 (s, 3H, hydrogen of methoxy group of mpip). <sup>13</sup>CNMR (62 MHz, D<sub>6</sub>-DMSO): ): 161.17,  
30 153.15, 153.04, 151.96, 151.64, 151.05, 150.95, 149.84, 147.67, 147.55, 146.44, 146.22, 137.34, 137.04, 136.55,  
31 130.92, 130.40, 128.82, 128.69, 128.52, 127.28, 126.78, 126.23, 125.97, 125.85, 124.02, 121.89, 116.3, 56.12  
32 (carbon of methoxy group of mpip).

1 S3.

2

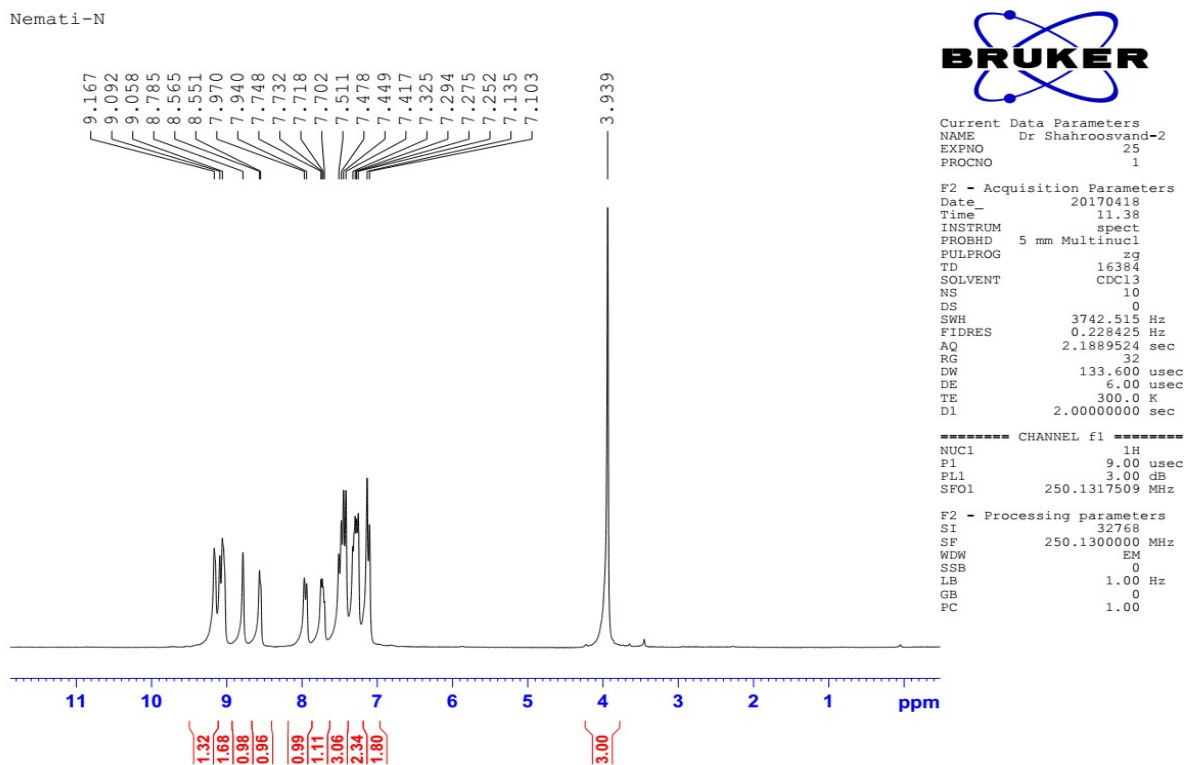

3

4

Figure S2. <sup>1</sup>H NMR spectra of phenanthroimidazole ligand (mpip) in CDCl<sub>3</sub>.

5

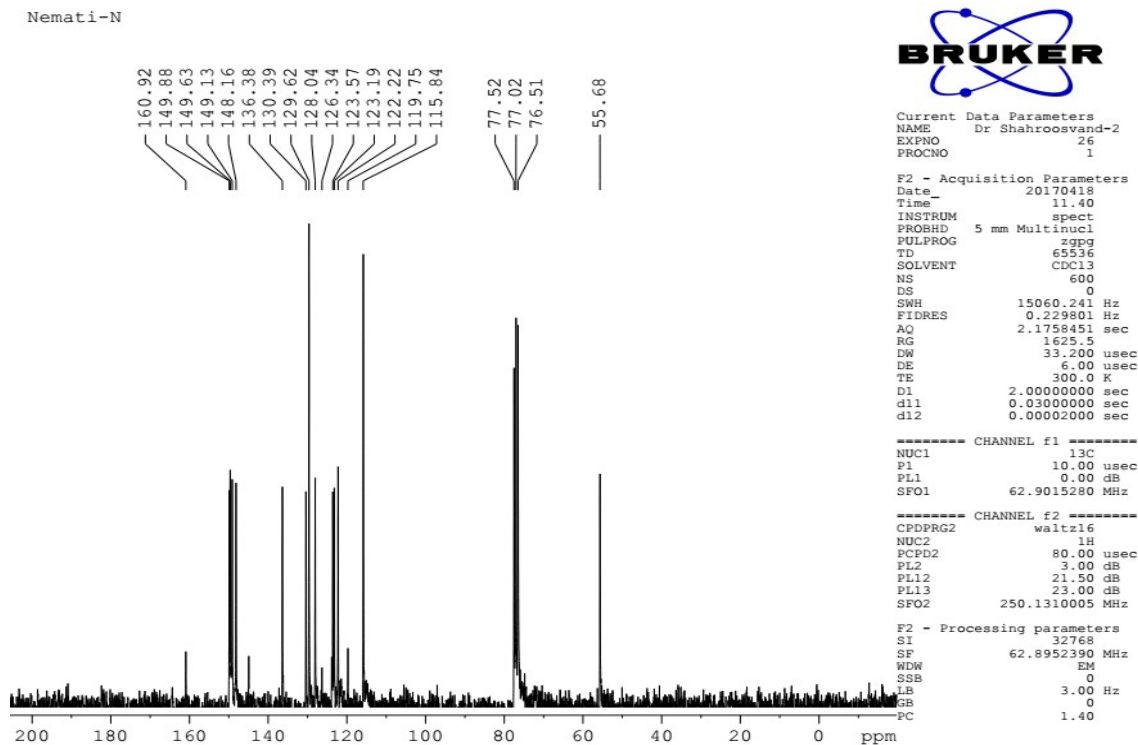

6

7

Figure S3. <sup>13</sup>C NMR spectra of phenanthroimidazole ligand (mpip) in CDCl<sub>3</sub>.

Nemati-Bn-1

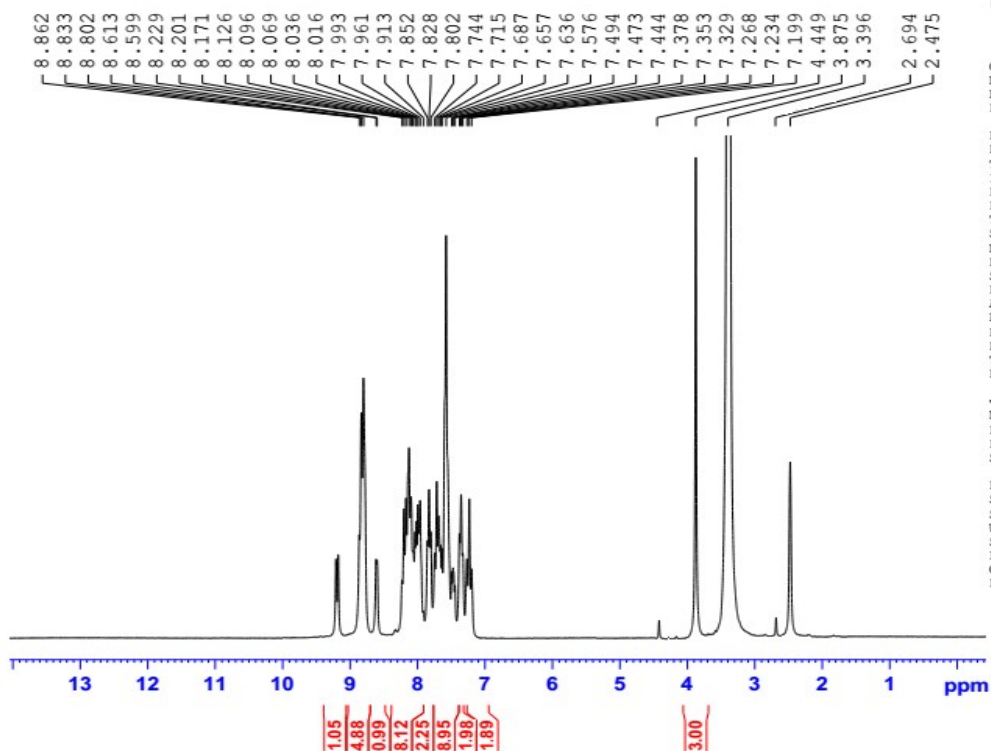

1  
2  
3

Figure S4. <sup>1</sup>H NMR spectra of Bn1 in D<sub>6</sub>-DMSO.

Nemati-Bn-1

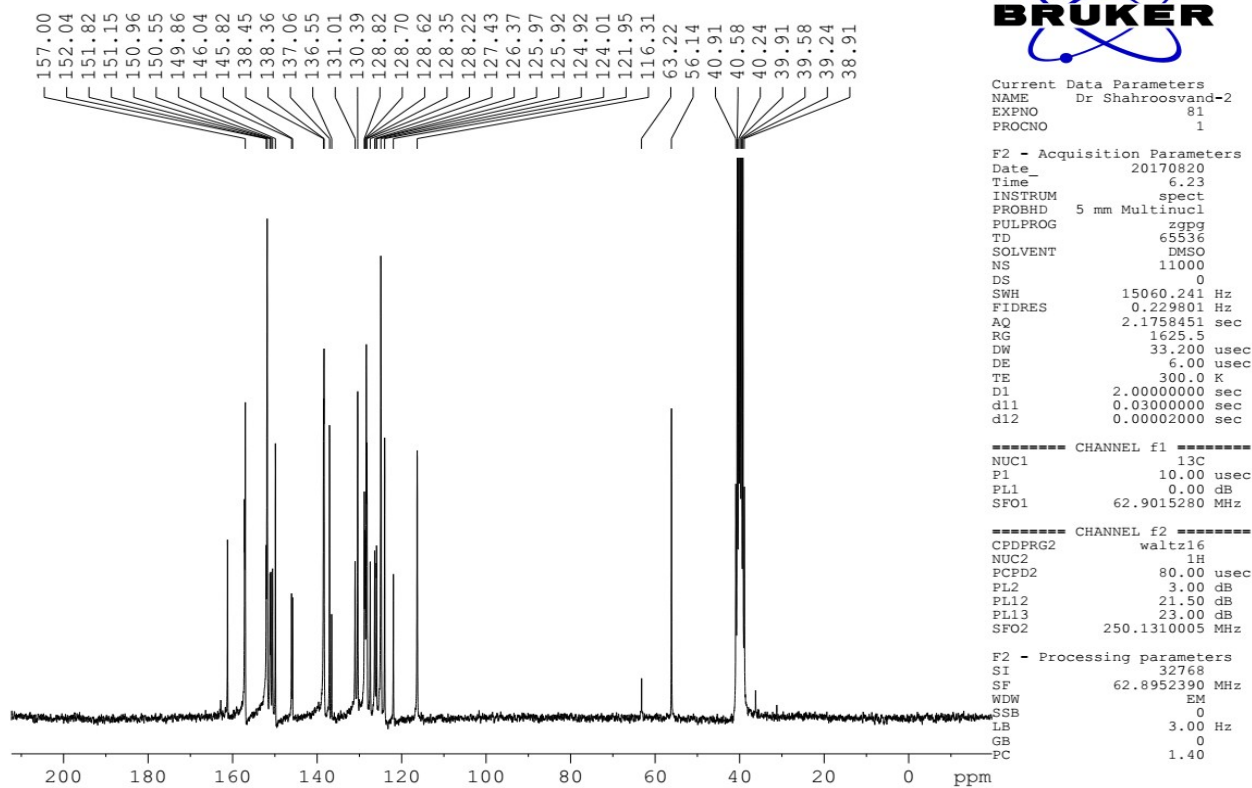

4  
5  
6

Figure S5. <sup>13</sup>C NMR spectra of Bn1 in D<sub>6</sub>-DMSO.

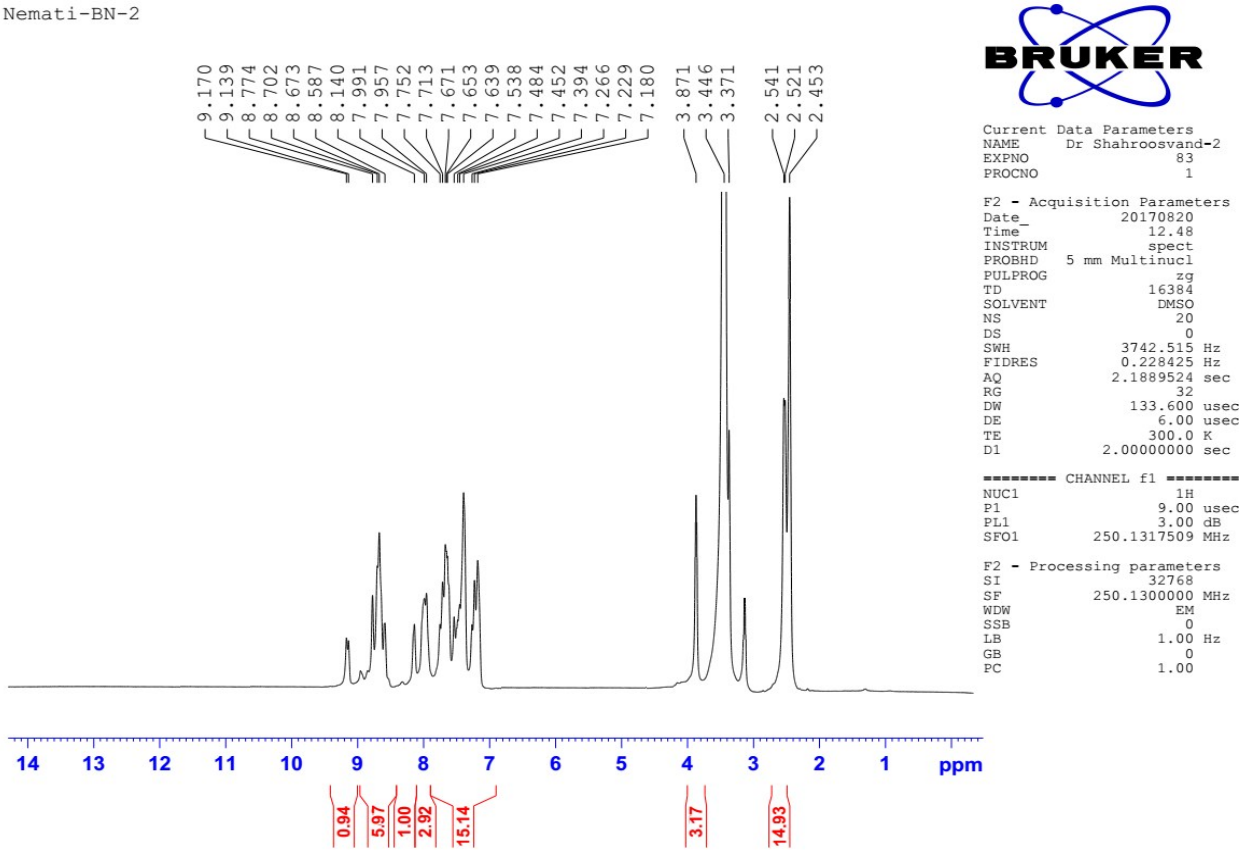

Figure S6. <sup>1</sup>H NMR spectra of Bn<sub>2</sub> in D<sub>6</sub>-DMSO.

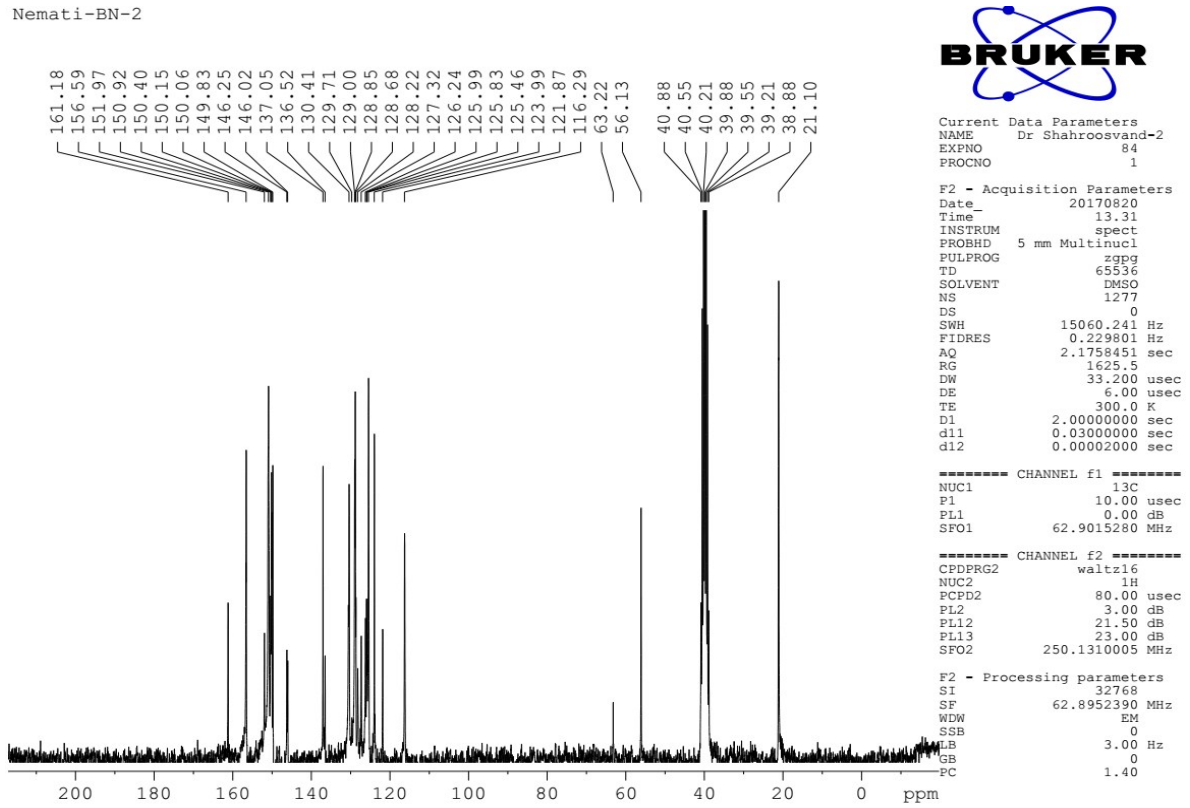

Figure S7. <sup>13</sup>C NMR spectra of Bn<sub>2</sub> in D<sub>6</sub>-DMSO.



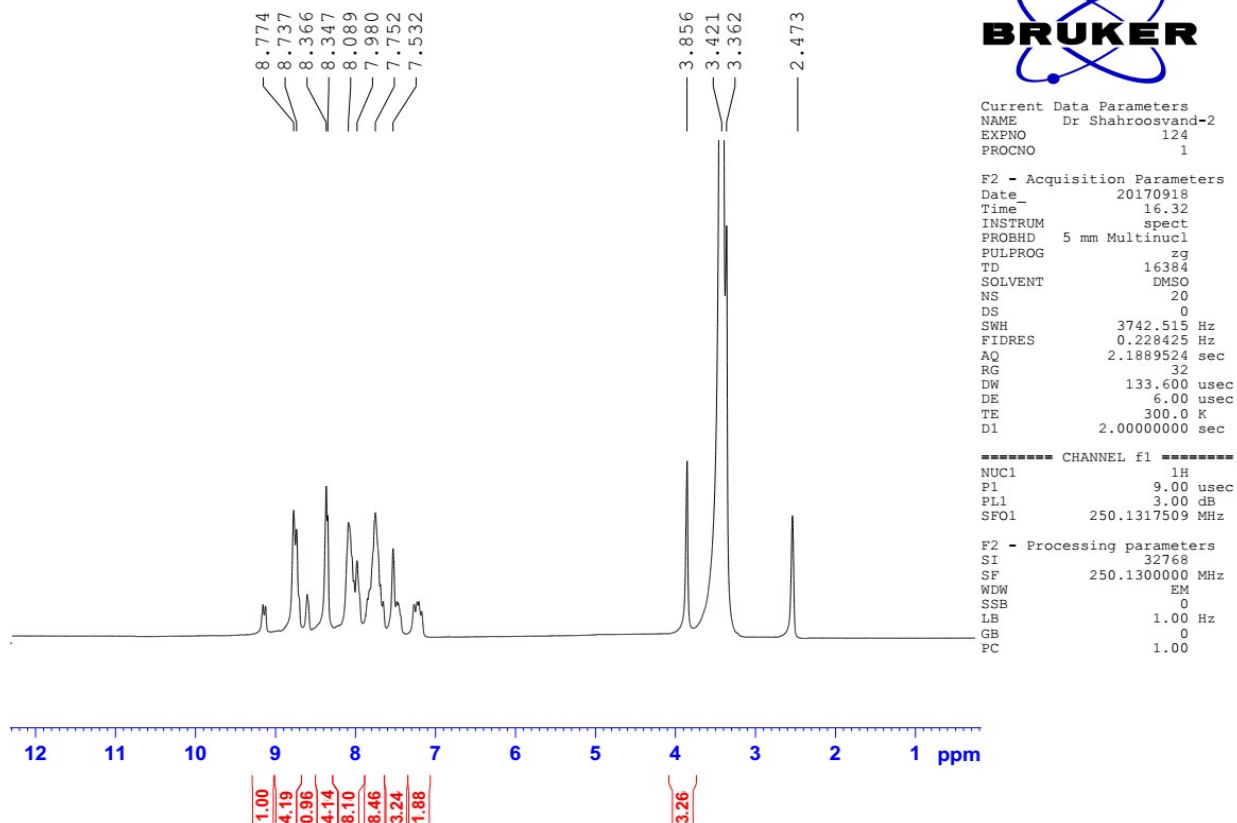

Figure S8. <sup>1</sup>H NMR spectra of Bn<sub>3</sub> in D<sub>6</sub>-DMSO.

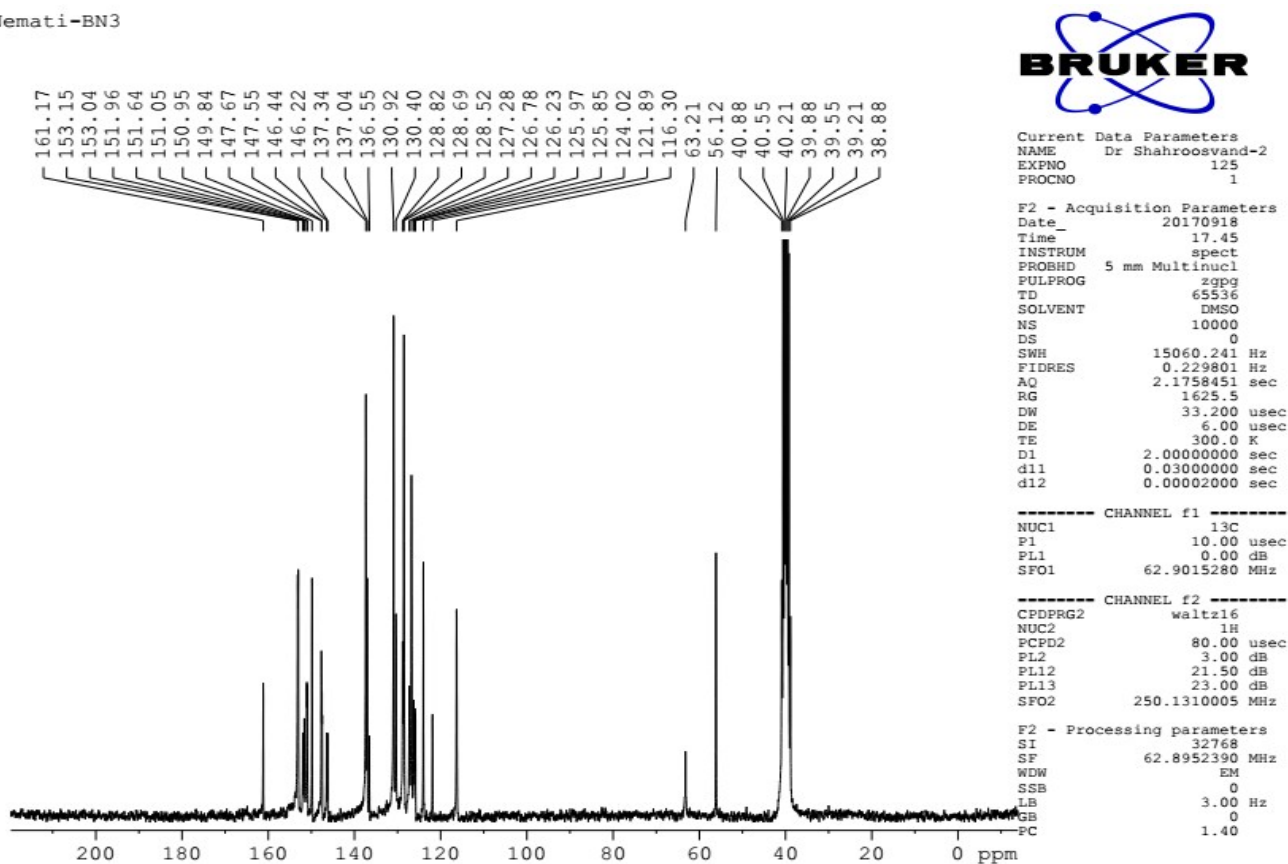

Figure S9. <sup>13</sup>C NMR spectra of Bn<sub>3</sub> in D<sub>6</sub>-DMSO.



| Com.                                        | Absorbance <sup>a</sup>               |            | Emission                       |                   | Ru(II/III)                                      | Ligan                     | E <sub>HOMO</sub> <sup>f</sup><br>(eV) | E <sub>LUMO</sub> <sup>g</sup><br>(eV) | E <sub>gap</sub> <sup>h</sup><br>(eV) |
|---------------------------------------------|---------------------------------------|------------|--------------------------------|-------------------|-------------------------------------------------|---------------------------|----------------------------------------|----------------------------------------|---------------------------------------|
|                                             | $\lambda_{max}[nm]$ ( $log\epsilon$ ) |            | $\lambda_{max}[nm](\varphi^d)$ |                   | Oxi.                                            | d Red.                    |                                        |                                        |                                       |
|                                             | Ligand Transitions                    |            | Solution <sup>b</sup>          | Film <sup>c</sup> | E <sub>1/2</sub> ( $\Delta E$ )(V) <sup>e</sup> | E <sub>red</sub><br>(V)   |                                        |                                        |                                       |
|                                             | MLCT                                  |            |                                |                   |                                                 |                           |                                        |                                        |                                       |
| NEo1                                        | 233 (4.61), 255 (4.10), 285 (4.98)    | 456 (4.25) | 605 (0.119)                    | 632               | 1.31 (0.075) <sup>i</sup>                       | -1.33 <sup>i</sup>        | -5.68                                  | -3.04                                  | 2.64                                  |
| NEo2                                        | 221 (4.95), 259 (4.11), 285 (4.96)    | 462 (4.22) | 618 (0.091)                    | 636               | 1.24 (0.084) <sup>i</sup>                       | -1.23 <sup>j</sup>        | -5.61                                  | -3.14                                  | 2.47                                  |
| NEo3                                        | 227 (4.87), 263 (4.98), 276 (4.18)    | 453 (4.21) | 595 (0.089)                    | 633               | 1.31 (0.063) <sup>i</sup>                       | -1.40 <sup>j</sup>        | -5.68                                  | -2.97                                  | 2.71                                  |
| Ru(bpy) <sub>3</sub> <sup>2+</sup><br>-3.14 | 245 (4.4), 290 (4.91)                 | 2.60       | 451 (4.17)                     | 621 (0.095)       | 648                                             | 1.29 (0.079) <sup>i</sup> | -1.31 <sup>i</sup>                     | -5.74                                  |                                       |

<sup>a</sup> In CH<sub>3</sub>CN solutions (1×10<sup>-5</sup>M). <sup>b</sup> In degassed CH<sub>3</sub>CN solutions at 298 K. <sup>c</sup> Neat films were made on glass substrates with a thickness of about 90 nm. <sup>d</sup> The emission quantum yields were calculated by comparison with [Ru(bpy)<sub>3</sub>]<sup>2+</sup> ( $\varphi_{std} = 0.095$ ) in acetonitrile solution at room temperature. <sup>e</sup> From CV measurements, E<sub>1/2</sub> = 1/2(E<sub>pa</sub>+E<sub>pc</sub>); 0.1 M acetonitrile/TBAP versus Ag/AgCl. <sup>f</sup> From the formula E<sub>HOMO</sub> = [-e(E<sub>ox</sub> - E<sub>1/2</sub>(Fc/Fc<sup>+</sup>))] - 4.8 eV. <sup>g</sup> From the formula E<sub>LUMO</sub> = [-e(E<sub>red</sub> - E<sub>1/2</sub>(Fc/Fc<sup>+</sup>))] - 4.8 eV. <sup>h</sup> From the formula E<sub>gap</sub> = E<sub>HOMO</sub> - E<sub>LUMO</sub>. <sup>i</sup> A reversible electrochemical process. <sup>j</sup> A irreversible electrochemical process. Reference [8].

Table S1. UV/Vis, Emission, and Redox Properties of NEo1-o3[8]

## 23 References:

- 1 [1] Yu, Q.Y., Huang, J. F., Shen, Y., Xiao, L.M., Liu, J. M., Kuang, D. B. & Su, C. Y. Novelphenanthroline-  
2 based ruthenium complexes for dye-sensitized solar cells: enhancement in performance through  
3 fluoro-substitution. *RSC. Adv.*, **2013**, 3, 19311.
- 4 [2] Suzuki, K., Kobayashi, A., Kaneko, S., Takehira, K., Yoshihara, T., Ishida, Shiina, H. K., Oishi, S.,  
5 Tobita, S. Reevaluation of absolute luminescence quantum yields of standard solutions using a  
6 spectrometer with an integrating sphere and a back-thinned CCD detector. *Phys. Chem. Chem. Phys.*,  
7 **2009**,11, 9850.
- 8 [3] Sullivan, P. B.;Salmon, D. J.;Meyer, T. Mixed phosphine 2,2'-bipyridine complexes of ruthenium.  
9 *Inorg. Chem.* **1978**, 17, 3334.
- 10 [4] Collin, J. P. & Sauvage, J. P. Synthesis and study of mononuclear ruthenium(II) complexes of  
11 sterically hindering diimine chelates. Implications for the catalytic oxidation of water to molecular  
12 oxygen. *Inorg. Chem.*, **1986**, 25, 135.
- 13 [5] Caspar, R., Cordier, C., Waern, J. B., Duhayon, C. G., Gruselle, M., Flochm P., Amouri, H. A new  
14 family of mono- and dicarboxylic ruthenium complexes  $[\text{Ru}(\text{DIP})_2(\text{L}_2)]^{2+}$  (DIP = 4,7-diphenyl-1,10-  
15 phenanthroline): synthesis, solution behavior, and X-ray molecular structure of trans-  
16  $[\text{Ru}(\text{DIP})_2(\text{MeOH})_2][\text{OTf}]_2$ . *Inorg. Chem.* **2006**, 45, 4071.
- 17 [6] Paq, W. & Eisenberg, R. Synthesis, characterization, and spectroscopy of dipyrrocatecholate  
18 complexes of platinum. *Inorg. Chem.* **1997**, 36, 2287.
- 19 [7] Gao, F. G.; Bard, A. J. High-brightness and low-voltage light-emitting devices based on trischelated  
20 ruthenium(II) and tris(2,2'-bipyridine) osmium(II) emitter layers and low melting point alloy cathode  
21 contacts. *Chem. Mater.* **2002**, 14, 3465.
- 22 [8] Nemati Bideh, B.; Rolda'n-Carmona, C.; Shahroosvand, H.; Nazeeruddin, M. K. Ruthenium  
23 phenanthroimidazole complexes for near infrared light-emitting electrochemical cells, *J. Mater.*  
24 *Chem. C*, **2016**, 4, 9674.
